# Supplementary material
Source: Springer Nature journal article supplement (https://www.springermedizin.de/resource/supplementary/12891_2009_756_MOESM6_ESM.pdf/9506542)

PTSC

ATSC

Tenocyte

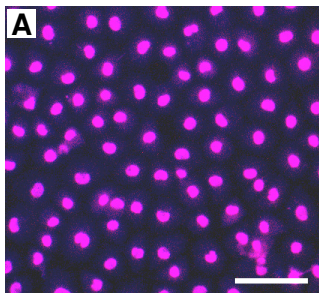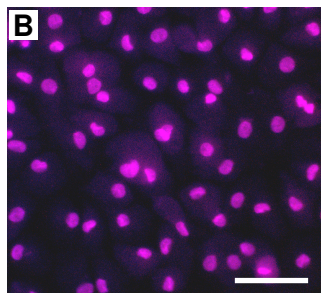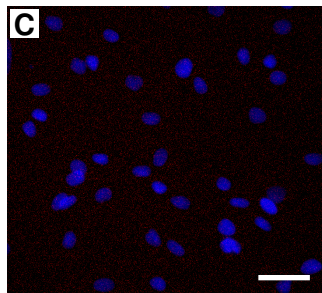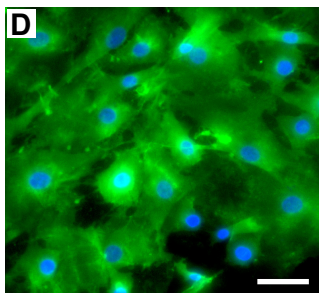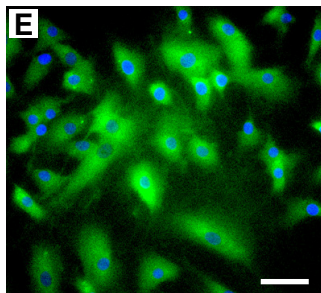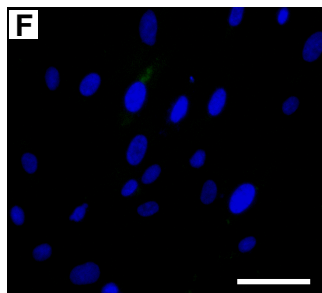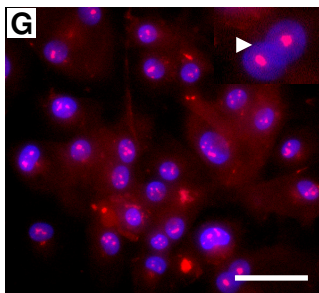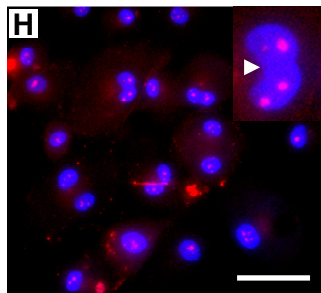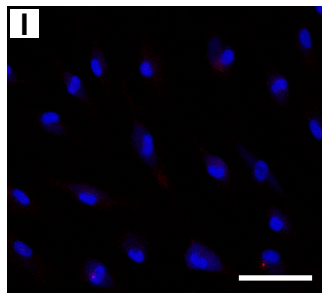

Supplement: MOESM6 [file 9506542]
